# Supplementary material for: Genetic Variants in the 3’UTR of BRCA1 and BRCA2 Genes and Their Putative Effects on the microRNA Mechanism in Hereditary Breast and Ovarian Cancer
Source: PubMed Central journal article supplement (PMC7277914; doi:10.3390/diagnostics10050298), 2020-05-13
Supplement: diagnostics-10-00298-s001.pdf [file diagnostics-10-00298-s001.pdf]

Supplementary Table 1. Tests for deviation from Hardy-Weinberg equilibrium and tests for association

| Gene                           | Allele                      | Frequencies | Cases %   | Controls % | P-value (cases vs control) | OR           | 95% I. C.                           | Gene                       | Allele   | Frequencies | Cases %   | Controls %  | P-value (cases vs control) | OR           | 95% I. C. |  |
|--------------------------------|-----------------------------|-------------|-----------|------------|----------------------------|--------------|-------------------------------------|----------------------------|----------|-------------|-----------|-------------|----------------------------|--------------|-----------|--|
| 3'UTR BRCA1                    | rs3092995<br>(c:*36 C > G)  | Genotype    | n = 50    | n = 50     |                            |              |                                     | rs15869<br>(c:*105 A > C)  | Genotype | n = 50      | n = 50    |             |                            |              |           |  |
|                                |                             | CC          | 82        | 76         | 0.7184                     | Reference    |                                     |                            | AA       | 84          | 82        | 0.36601     | Reference                  |              |           |  |
|                                |                             | CG          | 0         | 8          | 0.04282                    | 0.103        | 0.005-1.978                         |                            | AC       | 6           | 18        | 0.09686     | 0.325                      | 0.082-1.288  |           |  |
|                                |                             | GG          | 18        | 16         | 0.93779                    | 1.043        | 0.365-2.979                         |                            | CC       | 10          | 0         | 0.03152     | 10.741                     | 0.576-20.045 |           |  |
|                                |                             | P-value HWE | 1.537E-12 | 1.137E-07  |                            |              | P-value HWE                         |                            | 2.04E-07 | 0.4843      |           |             |                            |              |           |  |
|                                | Allele                      |             |           |            |                            |              | Allele                              |                            |          |             |           |             |                            |              |           |  |
|                                | C                           | 0.825       | 0.805     |            |                            |              | A                                   | 0.874                      | 0.912    |             |           |             |                            |              |           |  |
|                                | G                           | 0.175       | 0.195     |            |                            |              | C                                   | 0.126                      | 0.088    |             |           |             |                            |              |           |  |
|                                | rs8176318<br>(c:*421 G > T) | Genotype    | n = 50    | n = 50     |                            |              |                                     | rs733453<br>(c:*369 A > G) | Genotype | n = 50      | n = 50    |             |                            |              |           |  |
|                                |                             | GG          | 84        | 90         | 0.1178                     | Reference    |                                     |                            | AA       | 94          | 94        | 1.0000      | Reference                  |              |           |  |
|                                |                             | GT          | 10        | 10         | 0.91771                    | 1.071        | 0.289-3.967                         |                            | AG       | 0           | 0         | 1.0000      | 1                          | 0.019-5.144  |           |  |
|                                |                             | TT          | 6         | 0          | 0.07813                    | 7.494        | 0.376-14.9405                       |                            | GG       | 6           | 6         | 1.0000      | 1                          | 0.192-5.210  |           |  |
|                                |                             | P-value HWE | 0.0005    | 0.7097     |                            |              | P-value HWE                         |                            | 1.54E-12 | 1.54E-12    |           |             |                            |              |           |  |
|                                | Allele                      |             |           |            |                            |              | Allele                              |                            |          |             |           |             |                            |              |           |  |
|                                | G                           | 0.893       | 0.952     |            |                            |              | A                                   | 0.943                      | 0.943    |             |           |             |                            |              |           |  |
|                                | T                           | 0.107       | 0.048     |            |                            |              | G                                   | 0.057                      | 0.057    |             |           |             |                            |              |           |  |
| rs111791349<br>(c:*1113 G > A) | Genotype                    | n = 50      | n = 50    |            |                            |              | c:*457 (A > C)                      | Genotype                   | n = 50   | n = 50      |           |             |                            |              |           |  |
|                                | GG                          | 68          | 76        | 0.05402    | Reference                  |              |                                     | AA                         | 66       | 68          | 0.06251   | Reference   |                            |              |           |  |
|                                | GA                          | 12          | 18        | 0.60965    | 0.745                      | 0.240-2.311  |                                     | AC                         | 12       | 30          | 0.09596   | 0.412       | 0.143-1.191                |              |           |  |
|                                | AA                          | 20          | 6         | 0.04856    | 3.725                      | 0.946-14.671 |                                     | CC                         | 22       | 2           | 0.00645   | 11.333      | 1.385-92.772               |              |           |  |
|                                | P-value HWE                 | 1.14E-06    | 0.0375    |            |                            | P-value HWE  |                                     | 6.81E-07                   | 0.6555   |             |           |             |                            |              |           |  |
| Allele                         |                             |             |           |            |                            | Allele       |                                     |                            |          |             |           |             |                            |              |           |  |
| G                              | 0.854                       | 0.745       |           |            |                            | A            | 0.725                               | 0.833                      |          |             |           |             |                            |              |           |  |
| A                              | 0.146                       | 0.255       |           |            |                            | C            | 0.275                               | 0.167                      |          |             |           |             |                            |              |           |  |
| rs12516<br>(c:*1287 C > T)     | Genotype                    | n = 50      | n = 50    |            |                            |              | rs11571836<br>c:*532 (A > G)        | Genotype                   | n = 50   | n = 50      |           |             |                            |              |           |  |
|                                | CC                          | 88          | 88        | 0.08172    | Reference                  |              |                                     | AA                         | 82       | 82          | 0.30085   | Reference   |                            |              |           |  |
|                                | CT                          | 4           | 16        | 0.07816    | 0.07816                    | 0.051-1.279  |                                     | AG                         | 4        | 14          | 0.11308   | 0.286       | 0.056-1.458                |              |           |  |
|                                | TT                          | 14          | 0         | 0.00996    | 1.5361                     | 0.850-27.764 |                                     | GG                         | 14       | 4           | 0.11308   | 3.5         | 0.686-17.864               |              |           |  |
|                                | P-value HWE                 | 1.76E-09    | 0.5386    |            |                            | P-value HWE  |                                     | 1.76E-09                   | 0.0439   |             |           |             |                            |              |           |  |
| Allele                         |                             |             |           |            |                            | Allele       |                                     |                            |          |             |           |             |                            |              |           |  |
| C                              | 0.845                       | 0.922       |           |            |                            | A            | 0.845                               | 0.893                      |          |             |           |             |                            |              |           |  |
| T                              | 0.155                       | 0.078       |           |            |                            | G            | 0.155                               | 0.107                      |          |             |           |             |                            |              |           |  |
|                                |                             |             |           |            |                            |              | rs75353978<br>c:*838-839 (TT > - -) | Genotype                   | n = 50   | n = 50      |           |             |                            |              |           |  |
|                                |                             |             |           |            |                            | TT           |                                     | 92                         | 32       | 2.32E-18    | Reference |             |                            |              |           |  |
|                                |                             |             |           |            |                            | - -          |                                     | 8                          | 68       | 6.38E-10    | 2.4438    | 7.495-7.968 |                            |              |           |  |
|                                |                             |             |           |            |                            | P-value HWE  |                                     | 1.54E-12                   | 1.54E-12 |             |           |             |                            |              |           |  |
|                                |                             |             |           |            |                            | Allele       |                                     |                            |          |             |           |             |                            |              |           |  |
|                                |                             |             |           |            |                            | TT           | 0.326                               | 0.923                      |          |             |           |             |                            |              |           |  |
|                                |                             |             |           |            |                            | - -          | 0.674                               | 0.077                      |          |             |           |             |                            |              |           |  |
